# Supplementary material for: Seed-Transmitted Bacteria and Fungi Dominate Juvenile Plant Microbiomes
Source: Front Microbiol. 2021 Oct 22;12:737616. doi: 10.3389/fmicb.2021.737616 (PMC8569520; doi:10.3389/fmicb.2021.737616)
Supplement: Supplementary file 4 [file Table_2.xlsx]

## Sheet: Sheet1
Supplemental Table 2
Primer ID	Sequence	Notes
515FB_X1	ACACTCTTTCCCTACACGACGCTCTTCCGATCT GA GTGYCAGCMGCCGCGGTAA
515FB_X2	ACACTCTTTCCCTACACGACGCTCTTCCGATCT T GA GTGYCAGCMGCCGCGGTAA	Staggered by 1
515FB_X3	ACACTCTTTCCCTACACGACGCTCTTCCGATCT CT GA GTGYCAGCMGCCGCGGTAA	Staggered by 2
515FB_X4	ACACTCTTTCCCTACACGACGCTCTTCCGATCT ACT GA GTGYCAGCMGCCGCGGTAA	Staggered by 3
515FB_X5	ACACTCTTTCCCTACACGACGCTCTTCCGATCT GACT GA GTGYCAGCMGCCGCGGTAA	Staggered by 4
515FB_X6	ACACTCTTTCCCTACACGACGCTCTTCCGATCT TGACT GA GTGYCAGCMGCCGCGGTAA	Staggered by 5
806RB_X1	GTGACTGGAGTTCAGACGTGTGCTCTTCCGATCT AC GGACTACNVGGGTWTCTAAT
806RB_X2	GTGACTGGAGTTCAGACGTGTGCTCTTCCGATCT T AC GGACTACNVGGGTWTCTAAT	Staggered by 1
806RB_X3	GTGACTGGAGTTCAGACGTGTGCTCTTCCGATCT CT AC GGACTACNVGGGTWTCTAAT	Staggered by 2
806RB_X4	GTGACTGGAGTTCAGACGTGTGCTCTTCCGATCT ACT AC GGACTACNVGGGTWTCTAAT	Staggered by 3
806RB_X5	GTGACTGGAGTTCAGACGTGTGCTCTTCCGATCT GACT AC GGACTACNVGGGTWTCTAAT	Staggered by 4
806RB_X6	GTGACTGGAGTTCAGACGTGTGCTCTTCCGATCT TGACT AC GGACTACNVGGGTWTCTAAT	Staggered by 5
ITS1F_X1	ACACTCTTTCCCTACACGACGCTCTTCCGATCT GA CTTGGTCATTTAGAGGAAGTAA
ITS1F_X2	ACACTCTTTCCCTACACGACGCTCTTCCGATCT T GA CTTGGTCATTTAGAGGAAGTAA	Staggered by 1
ITS1F_X3	ACACTCTTTCCCTACACGACGCTCTTCCGATCT CT GA CTTGGTCATTTAGAGGAAGTAA	Staggered by 2
ITS1F_X4	ACACTCTTTCCCTACACGACGCTCTTCCGATCT ACT GA CTTGGTCATTTAGAGGAAGTAA	Staggered by 3
ITS1F_X5	ACACTCTTTCCCTACACGACGCTCTTCCGATCT GACT GA CTTGGTCATTTAGAGGAAGTAA	Staggered by 4
ITS1F_X6	ACACTCTTTCCCTACACGACGCTCTTCCGATCT TGACT GA CTTGGTCATTTAGAGGAAGTAA	Staggered by 5
ITS2R_X1	GTGACTGGAGTTCAGACGTGTGCTCTTCCGATCT AC GCTGCGTTCTTCATCGATGC
ITS2R_X2	GTGACTGGAGTTCAGACGTGTGCTCTTCCGATCT T AC GCTGCGTTCTTCATCGATGC	Staggered by 1
ITS2R_X3	GTGACTGGAGTTCAGACGTGTGCTCTTCCGATCT CT AC GCTGCGTTCTTCATCGATGC	Staggered by 2
ITS2R_X4	GTGACTGGAGTTCAGACGTGTGCTCTTCCGATCT ACT AC GCTGCGTTCTTCATCGATGC	Staggered by 3
ITS2R_X5	GTGACTGGAGTTCAGACGTGTGCTCTTCCGATCT GACT AC GCTGCGTTCTTCATCGATGC	Staggered by 4
ITS2R_X6	GTGACTGGAGTTCAGACGTGTGCTCTTCCGATCT TGACT AC GCTGCGTTCTTCATCGATGC	Staggered by 5
Truseq_F_bc1.1	AATGATACGGCGACCACCGAGATCTACAC TAGATC ACACTCTTTCCCTACACGACGC	Contain Index 2 (i5)
Truseq_F_bc1.2	AATGATACGGCGACCACCGAGATCTACAC CTCTCT ACACTCTTTCCCTACACGACGC	Contain Index 2 (i5)
Truseq_F_bc1.3	AATGATACGGCGACCACCGAGATCTACAC TATCCT ACACTCTTTCCCTACACGACGC	Contain Index 2 (i5)
Truseq_F_bc1.4	AATGATACGGCGACCACCGAGATCTACAC AGAGTA ACACTCTTTCCCTACACGACGC	Contain Index 2 (i5)
Truseq_F_bc1.5	AATGATACGGCGACCACCGAGATCTACAC GTAAGG ACACTCTTTCCCTACACGACGC	Contain Index 2 (i5)
Truseq_F_bc1.6	AATGATACGGCGACCACCGAGATCTACAC ACTGCA ACACTCTTTCCCTACACGACGC	Contain Index 2 (i5)
Truseq_F_bc1.7	AATGATACGGCGACCACCGAGATCTACAC AAGGAG ACACTCTTTCCCTACACGACGC	Contain Index 2 (i5)
Truseq_F_bc1.8	AATGATACGGCGACCACCGAGATCTACAC CTAAGC ACACTCTTTCCCTACACGACGC	Contain Index 2 (i5)
Truseq_F_bc1.9	AATGATACGGCGACCACCGAGATCTACAC TGAACC ACACTCTTTCCCTACACGACGC	Contain Index 2 (i5)
Truseq_F_bc1.10	AATGATACGGCGACCACCGAGATCTACAC TGCTAA ACACTCTTTCCCTACACGACGC	Contain Index 2 (i5)
Truseq_F_bc1.11	AATGATACGGCGACCACCGAGATCTACAC TAAGTT ACACTCTTTCCCTACACGACGC	Contain Index 2 (i5)
Truseq_F_bc1.12	AATGATACGGCGACCACCGAGATCTACAC ATAGAG ACACTCTTTCCCTACACGACGC	Contain Index 2 (i5)
Truseq_F_bc1.13	AATGATACGGCGACCACCGAGATCTACAC GGCTCT ACACTCTTTCCCTACACGACGC	Contain Index 2 (i5)
Truseq_F_bc1.14	AATGATACGGCGACCACCGAGATCTACAC AGGCGA ACACTCTTTCCCTACACGACGC	Contain Index 2 (i5)
Truseq_F_bc1.15	AATGATACGGCGACCACCGAGATCTACAC TAATCT ACACTCTTTCCCTACACGACGC	Contain Index 2 (i5)
Truseq_F_bc1.16	AATGATACGGCGACCACCGAGATCTACAC CAGGAC ACACTCTTTCCCTACACGACGC	Contain Index 2 (i5)
Truseq_F_bc1.17	AATGATACGGCGACCACCGAGATCTACAC TACGAA ACACTCTTTCCCTACACGACGC	Contain Index 2 (i5)
Truseq_F_bc1.18	AATGATACGGCGACCACCGAGATCTACAC ATCCGG ACACTCTTTCCCTACACGACGC	Contain Index 2 (i5)
Truseq_F_bc1.19	AATGATACGGCGACCACCGAGATCTACAC TAGGCC ACACTCTTTCCCTACACGACGC	Contain Index 2 (i5)
Truseq_F_bc1.20	AATGATACGGCGACCACCGAGATCTACAC ATATCG ACACTCTTTCCCTACACGACGC	Contain Index 2 (i5)
Truseq_F_bc1.21	AATGATACGGCGACCACCGAGATCTACAC TAGCTA ACACTCTTTCCCTACACGACGC	Contain Index 2 (i5)
Truseq_F_bc1.22	AATGATACGGCGACCACCGAGATCTACAC ATCGCC ACACTCTTTCCCTACACGACGC	Contain Index 2 (i5)
Truseq_F_bc1.23	AATGATACGGCGACCACCGAGATCTACAC ATAAAA ACACTCTTTCCCTACACGACGC	Contain Index 2 (i5)
Truseq_F_bc1.24	AATGATACGGCGACCACCGAGATCTACAC TATGGT ACACTCTTTCCCTACACGACGC	Contain Index 2 (i5)
Truseq_R_bc2.1	CAAGCAGAAGACGGCATACGAGAT ATTGGT GTGACTGGAGTTCAGACGTGTGCT	Contain Index 1 (i7)
Truseq_R_bc2.2	CAAGCAGAAGACGGCATACGAGAT TAAAGA GTGACTGGAGTTCAGACGTGTGCT	Contain Index 1 (i7)
Truseq_R_bc2.3	CAAGCAGAAGACGGCATACGAGAT ATCACT GTGACTGGAGTTCAGACGTGTGCT	Contain Index 1 (i7)
Truseq_R_bc2.4	CAAGCAGAAGACGGCATACGAGAT TATTTC GTGACTGGAGTTCAGACGTGTGCT	Contain Index 1 (i7)
Truseq_R_bc2.5	CAAGCAGAAGACGGCATACGAGAT ATATTG GTGACTGGAGTTCAGACGTGTGCT	Contain Index 1 (i7)
Truseq_R_bc2.6	CAAGCAGAAGACGGCATACGAGAT TATACA GTGACTGGAGTTCAGACGTGTGCT	Contain Index 1 (i7)
Truseq_R_bc2.7	CAAGCAGAAGACGGCATACGAGAT ATGATC GTGACTGGAGTTCAGACGTGTGCT	Contain Index 1 (i7)
Truseq_R_bc2.8	CAAGCAGAAGACGGCATACGAGAT TACTCT GTGACTGGAGTTCAGACGTGTGCT	Contain Index 1 (i7)
Truseq_R_bc2.9	CAAGCAGAAGACGGCATACGAGAT ATAAGC GTGACTGGAGTTCAGACGTGTGCT	Contain Index 1 (i7)
Truseq_R_bc2.10	CAAGCAGAAGACGGCATACGAGAT TAGTAT GTGACTGGAGTTCAGACGTGTGCT	Contain Index 1 (i7)
Truseq_R_bc2.11	CAAGCAGAAGACGGCATACGAGAT ATTACA GTGACTGGAGTTCAGACGTGTGCT	Contain Index 1 (i7)
Truseq_R_bc2.12	CAAGCAGAAGACGGCATACGAGAT TAATTG GTGACTGGAGTTCAGACGTGTGCT	Contain Index 1 (i7)
Truseq_R_bc2.13	CAAGCAGAAGACGGCATACGAGAT ATCTCT GTGACTGGAGTTCAGACGTGTGCT	Contain Index 1 (i7)
Truseq_R_bc2.14	CAAGCAGAAGACGGCATACGAGAT TAGACC GTGACTGGAGTTCAGACGTGTGCT	Contain Index 1 (i7)
Truseq_R_bc2.15	CAAGCAGAAGACGGCATACGAGAT ATGCGG GTGACTGGAGTTCAGACGTGTGCT	Contain Index 1 (i7)
Truseq_R_bc2.16	CAAGCAGAAGACGGCATACGAGAT TAATCA GTGACTGGAGTTCAGACGTGTGCT	Contain Index 1 (i7)
Truseq_R_bc2.17	CAAGCAGAAGACGGCATACGAGAT ATTTTC GTGACTGGAGTTCAGACGTGTGCT	Contain Index 1 (i7)
Truseq_R_bc2.18	CAAGCAGAAGACGGCATACGAGAT TACACT GTGACTGGAGTTCAGACGTGTGCT	Contain Index 1 (i7)
Truseq_R_bc2.19	CAAGCAGAAGACGGCATACGAGAT ATGGCC GTGACTGGAGTTCAGACGTGTGCT	Contain Index 1 (i7)
Truseq_R_bc2.20	CAAGCAGAAGACGGCATACGAGAT TACCGG GTGACTGGAGTTCAGACGTGTGCT	Contain Index 1 (i7)
Truseq_R_bc2.21	CAAGCAGAAGACGGCATACGAGAT ATCGAA GTGACTGGAGTTCAGACGTGTGCT	Contain Index 1 (i7)
Truseq_R_bc2.22	CAAGCAGAAGACGGCATACGAGAT TATAGT GTGACTGGAGTTCAGACGTGTGCT	Contain Index 1 (i7)
Truseq_R_bc2.23	CAAGCAGAAGACGGCATACGAGAT ATCGTA GTGACTGGAGTTCAGACGTGTGCT	Contain Index 1 (i7)
Truseq_R_bc2.24	CAAGCAGAAGACGGCATACGAGAT TAGAAT GTGACTGGAGTTCAGACGTGTGCT	Contain Index 1 (i7)
Truseq_R_bc2.25	CAAGCAGAAGACGGCATACGAGAT ATGCTA GTGACTGGAGTTCAGACGTGTGCT	Contain Index 1 (i7)
Truseq_R_bc2.26	CAAGCAGAAGACGGCATACGAGAT TAATCG GTGACTGGAGTTCAGACGTGTGCT	Contain Index 1 (i7)
Truseq_R_bc2.27	CAAGCAGAAGACGGCATACGAGAT ATATCA GTGACTGGAGTTCAGACGTGTGCT	Contain Index 1 (i7)
Truseq_R_bc2.28	CAAGCAGAAGACGGCATACGAGAT TAGCGG GTGACTGGAGTTCAGACGTGTGCT	Contain Index 1 (i7)
Truseq_R_bc2.29	CAAGCAGAAGACGGCATACGAGAT ATGCTC GTGACTGGAGTTCAGACGTGTGCT	Contain Index 1 (i7)
Truseq_R_bc2.30	CAAGCAGAAGACGGCATACGAGAT TACGAT GTGACTGGAGTTCAGACGTGTGCT	Contain Index 1 (i7)
Truseq_R_bc2.31	CAAGCAGAAGACGGCATACGAGAT ATAGGA GTGACTGGAGTTCAGACGTGTGCT	Contain Index 1 (i7)
Truseq_R_bc2.32	CAAGCAGAAGACGGCATACGAGAT ATTAGT GTGACTGGAGTTCAGACGTGTGCT	Contain Index 1 (i7)
